# Supplementary material for: The Kv2.2 channel mediates the inhibition of prostaglandin E2 on glucose-stimulated insulin secretion in pancreatic β-cells
Source: eLife journal article supplement (doi:10.7554/elife.97234), 2024-06-21
Supplement: fig2-data3 [file elife-97234-fig2-data3-v1.zip]

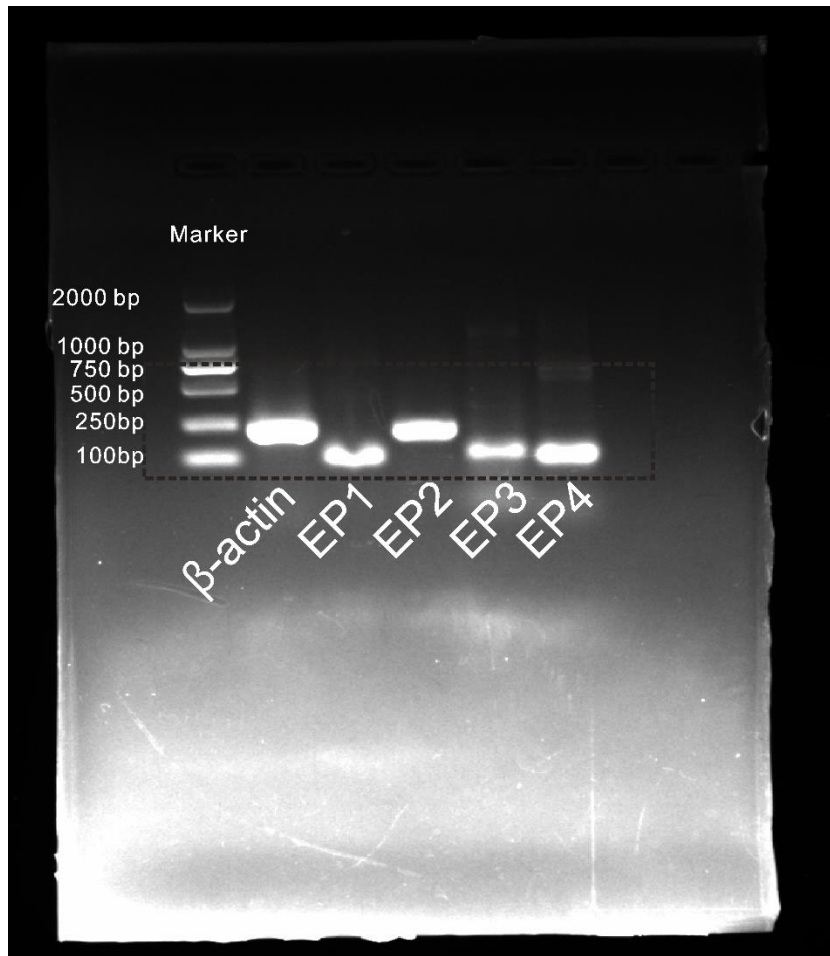

**Figure 2A-Source Data 2.** Uncropped DNA gel image for Fig. 2A. The area enclosed by the dashed line represents the content shown in Figure 2A.
