# Supplementary material for: The Kv2.2 channel mediates the inhibition of prostaglandin E2 on glucose-stimulated insulin secretion in pancreatic β-cells
Source: eLife journal article supplement (doi:10.7554/elife.97234), 2024-06-21
Supplement: fig3-data3 [file elife-97234-fig3-data3-v1.zip]

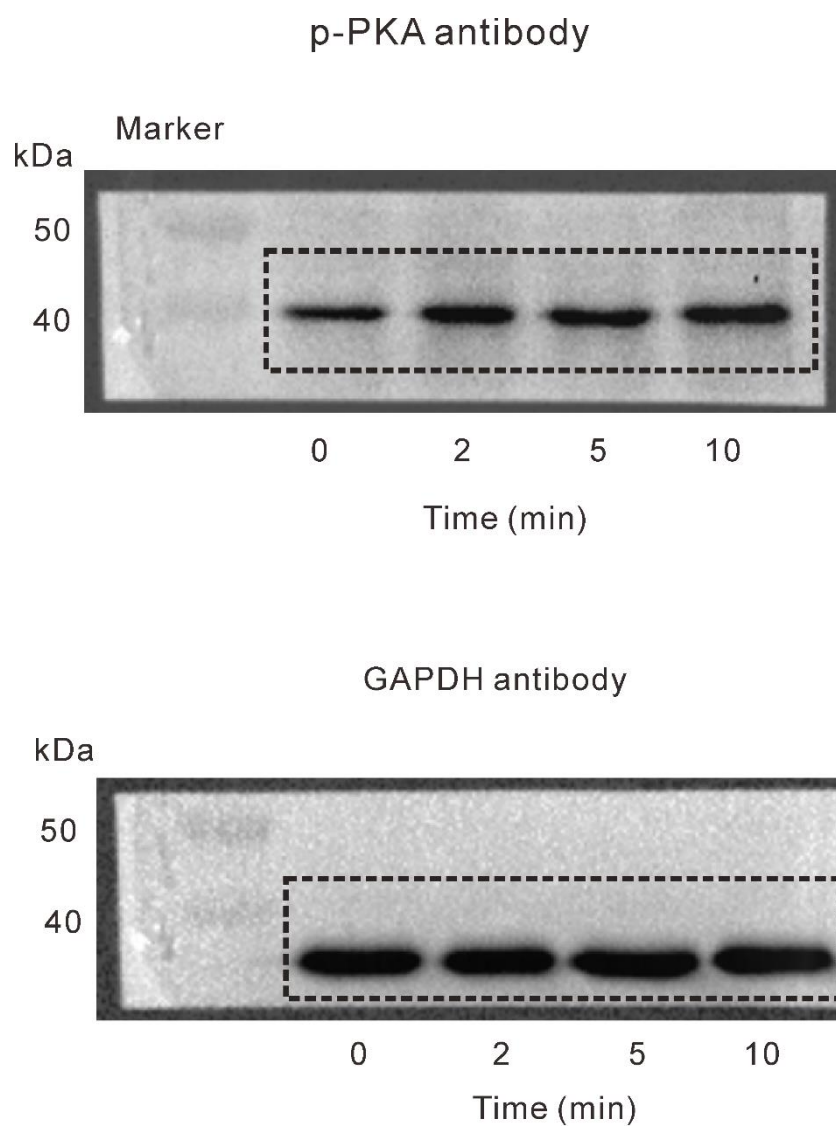

**Figure 3A-Source Data 2.** Original western blot images corresponding to Figure 3A. The areas enclosed by the dashed lines represent the content shown in Figure 3A.
