# Supplementary material for: The Kv2.2 channel mediates the inhibition of prostaglandin E2 on glucose-stimulated insulin secretion in pancreatic β-cells
Source: eLife journal article supplement (doi:10.7554/elife.97234), 2024-06-21
Supplement: fig4-data3 [file elife-97234-fig4-data3-v1.zip]

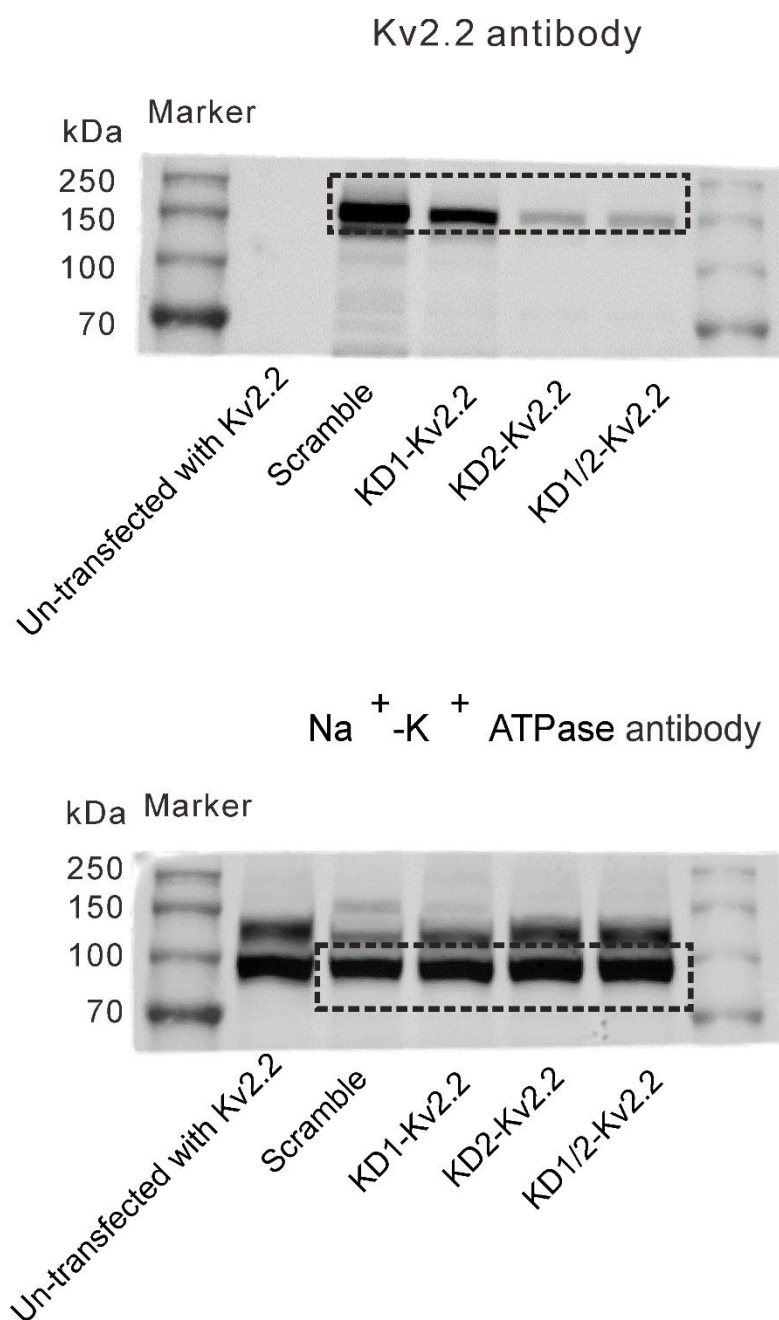

**Figure 4C, Source Data 1.** Original western blot images corresponding to Figure 4C. The areas enclosed by the dashed lines represent the content shown in Figure 4C.
