# Supplementary material for: The Kv2.2 channel mediates the inhibition of prostaglandin E2 on glucose-stimulated insulin secretion in pancreatic β-cells
Source: eLife journal article supplement (doi:10.7554/elife.97234), 2024-06-21
Supplement: fig5-figsupp1-data3 [file elife-97234-fig5-figsupp1-data3-v1.zip]

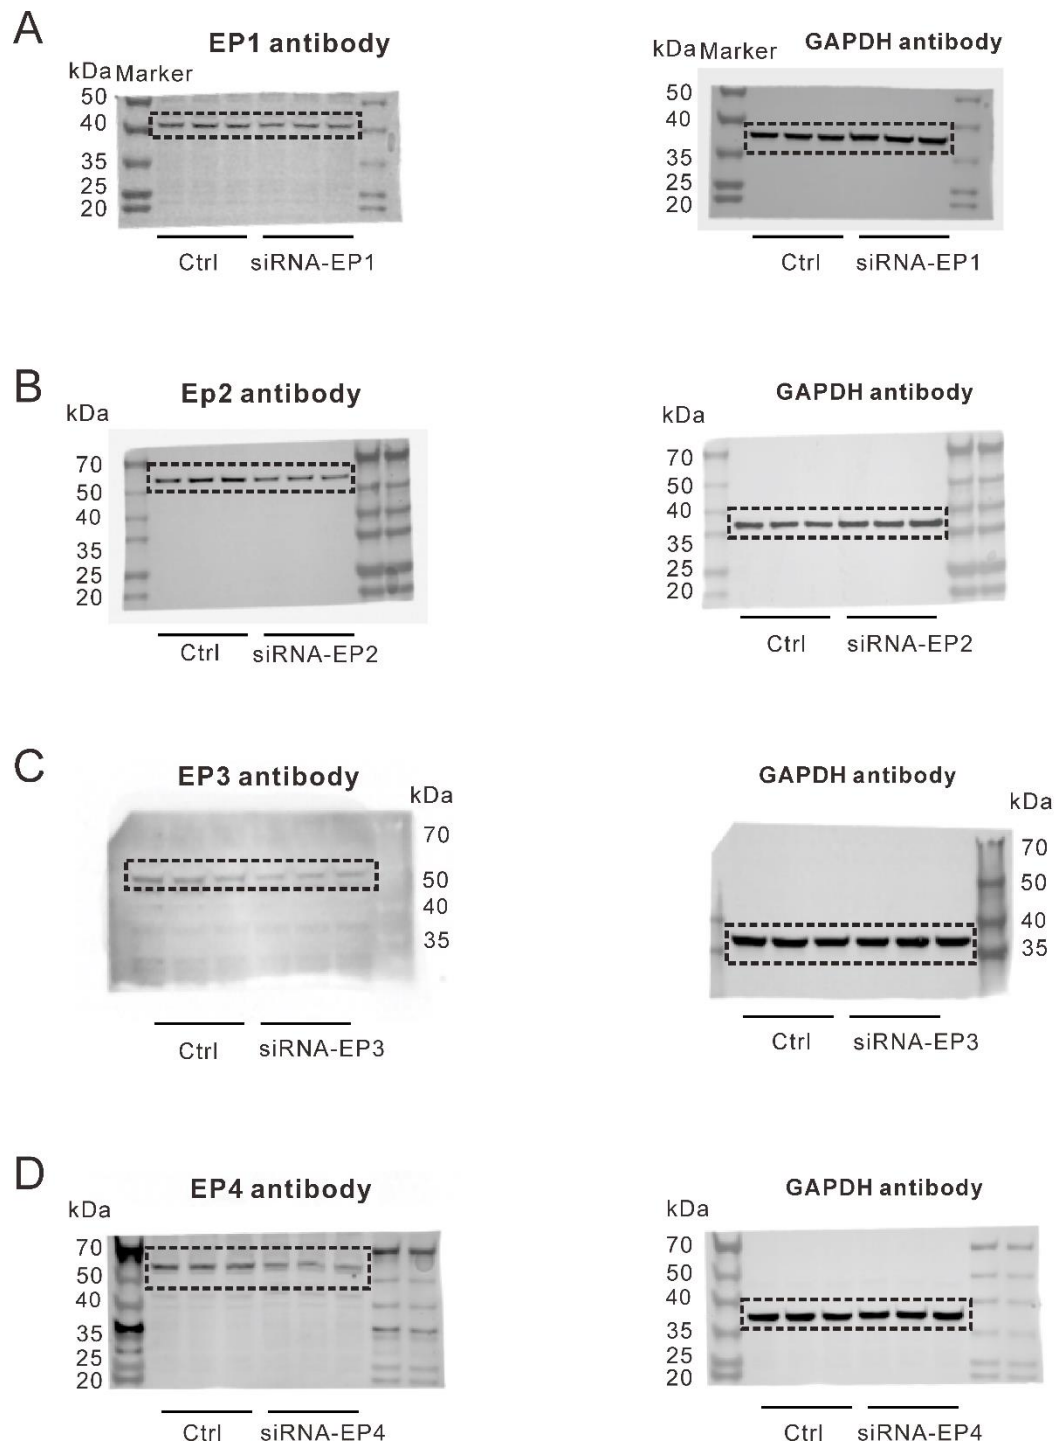

**Figure 5-figure supplement 1-Source Data 2.** Original western blot images corresponding to Figure 5-figure supplement 1. The areas enclosed by the dashed lines represent the content shown in Figure 5-figure supplement 1 (A~D).
