# Supplementary material for: The Kv2.2 channel mediates the inhibition of prostaglandin E2 on glucose-stimulated insulin secretion in pancreatic β-cells
Source: eLife. 2025 Mar 3;13:RP97234. doi: 10.7554/eLife.97234 (PMC11875535; doi:10.7554/eLife.97234)
Supplement: Figure 1—source data 1. [file elife-97234-fig1-data1.xlsx]

## Sheet: Fig1B-source data
Fig1B-source data	Time (s)	Amplitude (norm.)
	10	1.0174
	20	1.00529
	30	1
	40	1
	50	1.01352
	60	0.999803
	70	0.994804
	80	0.96726
	90	0.97241
	100	0.941659
	110	0.950117
	120	0.961193
	130	0.953675
	140	0.933547
	150	0.905779
	160	0.885951
	170	0.861924
	180	0.841148
	190	0.823446
	200	0.811048
	210	0.795969
	220	0.779502
	230	0.760791
	240	0.745
	250	0.739401
	260	0.729193
	270	0.711975
	280	0.724199
	290	0.726691
	300	0.730275
	310	0.728047
	320	0.738047
	330	0.737083
	340	0.735963
	350	0.727169
	360	0.713494
	370	0.699556
	380	0.704406
	390	0.707901
	400	0.706003
	410	0.720374
	420	0.717426
	430	0.732738
	440	0.716855

## Sheet: Fig1C-source data
Fig1C-source data
	Concentration (μM)
	Ctrl	0.01	0.1	1	10	100
	1.11797	0.975843	0.94	0.9145	0.726055	0.559197
	1.04246	0.969671	0.911085	0.76722	0.738233	0.342004
	0.988051	0.943569	0.826	0.797434	0.637309	0.840584
	0.981967	0.962151	0.8097	0.6482	0.560768	0.725167
	1.03005	0.913114	0.8744	0.8193	0.624694	0.896405
	1.03253	0.970237	0.96237	0.888	0.539339	0.775762
	1.10828	0.8882	0.968	0.81269	0.664543	0.839868
	0.933225		0.9183	0.72652	0.62927	0.446623
	1.01868			0.864069	0.642053	0.764851
	1.04268				0.672608	0.572142
					0.759684	0.442014
					0.844882	0.459184
					0.760318	0.853543
					0.566102	0.831727
					0.580129	0.768611
					0.669282	0.761405
					0.805225	0.645371
					0.730012
					0.525844
					0.736813
					0.554475
					0.478709
					0.437046
					0.690223

## Sheet: Fig1D-source data
Fig1D-source data			Ctrl										PGE2
		-80	0.12289	0.287224	0.384256	0.493546	0.126186	0.284429	0.686646				0.303133	0.076212	0.338145	0.082258	0.05824	0.448199	0.671387
		-70	0.177507	-0.24806	0.292034	0.065806	0.126186	0.317891	2.01416				0.250414	0.04355	0.245924	0.674513	0.135893	0.33615	0.701904
		-60	0.232125	0.248057	0.261294	0.21387	0.174719	0.200774	0.839233				0.158156	0.108875	0.414996	0.674513	0.145599	0.448199	0.778198
		-50	0.382323	0.770283	0.01537	0.180967	0.174719	0.401547	3.46374				0.158156	-0.01089	0.338145	0.5429	-0.12619	-2.28902	1.12915
		-40	0.163853	0.182779	0.138332	0.444191	0.815355	0.719439	1.61743				0.316313	0.065325	0.69166	1.23386	0.048533	0.192085	2.47192
		-30	0.286742	0.104445	0.107592	1.6616	5.17362	0.903481	0.701904				0.395391	-0.45727	2.15183	3.98127	0.165012	-0.43219	7.46155
		-20	0.750992	0.470003	1.69073	1.92483	13.9193	2.5264	5.35583				0.514008	0.642361	12.204	7.97899	1.18421	4.16185	17.9443
		-10	1.78873	2.04974	13.2338	11.2693	24.383	11.5779	18.0206				1.23889	3.57109	38.6254	18.0309	6.96934	10.1485	30.1666
		0	7.50992	11.5673	49.4614	31.6198	35.4194	29.2126	37.7197				6.77436	11.5734	73.5311	28.017	15.6373	17.1276	45.3949
		10	17.2728	27.7824	97.6317	58.8471	47.3294	49.5409	55.3589				15.7893	21.9818	112.356	40.5859	26.2952	24.9551	60.3027
		20	29.1248	46.3475	146.079	90.3847	59.4141	67.3762	77.7741				26.1222	32.9346	152.35	52.2665	37.7975	32.7826	75.6073
		30	41.7688	65.1738	191.774	118.122	71.7901	84.6428	99.6704				36.9559	43.0055	193.603	62.2526	49.659	40.7541	96.2219
		40	54.6995	81.9895	238.377	150.071	84.2534	99.9852	114.716				47.3942	55.8527	234.411	74.2786	62.8503	47.8933	117.157
		50	69.1049	99.3404	283.519	177.923	97.5029	111.797	150.192				57.7007	65.0091	275.404	88.0321	74.77	58.8262	138.901

## Sheet: Fig1E-source data
Fig1E-source data		Ctrl										PGE2
	-80	0.01074	0.01746	0.00591	0.00647	0.00812	0.05594	0.08858	0.08008	0.03416		0.03172	0.00708	0.08	0.00514	0.00805	0.08196	0.06585	0.07029	0.04376
	-70	0.01118	-0.01087	0.01561	0.00284	0.00195	0.01192	0.05219	0.00641	0.0114		0.01888	0.00292	0.02162	0.0037	0.00464	0.0462	0.04287	0.08635	0.0284
	-60	0.01143	0.00849	0.00333	0.00127	0.00419	0.02486	0.03342	0.02297	0.01374		0.00932	0.0057	0.01895	0.00289	0.00145	0.02194	0.04787	0.05985	0.021
	-50	0.01545	0.02165	0.00486	0.00156	0.00141	0.02842	0.0374	0.02743	0.01727		0.00765	-0.00046758	0.05171	0.00225	0.00194	0.01726	0.0203	0.05614	0.0196
	-40	0.00561	0.00436	0.00901	0.00232	0.00212	0.02843	0.02991	0.01279	0.01182		0.01298	0.00238	0.041	0.00488	0.00467	0.02132	0.01472	0.04009	0.01775
	-30	0.00853	0.00216	0.02056	0.0045	0.00288	0.03004	0.0312	0.05856	0.0198		0.01408	-0.01446	0.10863	0.03911	0.02291	0.07321	0.03495	0.10931	0.04847
	-20	0.01973	0.00859	0.06494	0.04948	0.02605	0.06469	0.0834	0.19155	0.06355		0.01618	0.01794	0.24581	0.16668	0.11476	0.21087	0.14672	0.2491	0.14601
	-10	0.04209	0.03356	0.24238	0.199	0.13069	0.24448	0.22408	0.37326	0.18619		0.03492	0.08933	0.41385	0.3277	0.28926	0.35367	0.30096	0.41953	0.27865
	0	0.16003	0.17147	0.42613	0.37726	0.31054	0.4243	0.38853	0.55517	0.35168		0.17289	0.26216	0.55767	0.48571	0.46572	0.50214	0.45142	0.5854	0.43539
	10	0.33628	0.37627	0.60096	0.5332	0.47795	0.57377	0.53161	0.6371	0.50839		0.36816	0.45493	0.66511	0.62288	0.61307	0.6369	0.5972	0.68294	0.58015
	20	0.52196	0.57781	0.72175	0.67386	0.63381	0.70109	0.66079	0.746	0.65463		0.56067	0.62742	0.78101	0.73575	0.73608	0.76488	0.73041	0.78545	0.71521
	30	0.69344	0.75268	0.81053	0.79814	0.76658	0.79619	0.80403	0.83153	0.78164		0.7348	0.75895	0.88243	0.83857	0.82322	0.85197	0.84589	0.86421	0.825
	40	0.84583	0.88194	0.86309	0.90651	0.89534	0.90627	0.9013	0.90442	0.88809		0.87771	0.91808	0.9508	0.92092	0.90519	0.92596	0.91708	0.92708	0.91785
	50	1	1	1	1	1	1	1	1	1		1	1	1	1	1	1	1	1	1

## Sheet: Fig1F-source data
Fig1F-source data		Ctrl								PGE2
	-50	1	1	0.983207	1	0.868582	1	1		1	1	1	0.964325	1	1	1
	-40	0.999789	0.951657	1	0.979065	0.976173	0.986211	0.983376		0.983756	0.97456	0.992304	1	0.985014	0.958083	0.992983
	-30	0.984981	0.924734	0.996914	0.935878	1	0.96318	0.978406		0.990731	0.965355	0.987859	0.997526	0.977447	0.96622	0.990878
	-20	0.970102	0.923999	0.986433	0.9005	0.958884	0.928309	0.964848		1.20543	0.931393	0.98166	0.971812	0.918254	0.963865	0.941845
	-10	0.958527	0.88332	0.952513	0.877242	0.867624	0.861249	0.884966		1.18637	0.834663	0.955925	0.858786	0.797252	0.888132	0.82776
	0	0.838293	0.780507	0.841489	0.707	0.704662	0.712037	0.731367		1.07714	0.691365	0.872526	0.705881	0.650282	0.739854	0.652302
	10	0.664536	0.613734	0.649359	0.514954	0.537632	0.530674	0.545561		0.924072	0.523124	0.663996	0.527642	0.500014	0.553279	0.482825
	20	0.486294	0.417557	0.419816	0.330645	0.35856	0.341453	0.336151		0.668605	0.348029	0.41645	0.297843	0.344385	0.338645	0.300748
	30	0.259799	0.204096	0.176968	0.165672	0.186669	0.162447	0.144313		0.362733	0.167006	0.159043	0.128368	0.174737	0.160251	0.120004
	40	0.00951484	-0.00140961	-0.0642341	-0.0247939	0.0176882	-0.0158974	-0.0481347		0.00805727	-0.00807292	-0.108085	-0.0279023	0.00994626	-0.0231386	-0.0608765
