# Supplementary material for: The Kv2.2 channel mediates the inhibition of prostaglandin E2 on glucose-stimulated insulin secretion in pancreatic β-cells
Source: eLife. 2025 Mar 3;13:RP97234. doi: 10.7554/eLife.97234 (PMC11875535; doi:10.7554/eLife.97234)
Supplement: Figure 2—source data 1. [file elife-97234-fig2-data1.xlsx]

## Sheet: Fig2A-source data
Fig2A-source data	EP1	EP2	EP3	EP4
	0.0905589	0.490275	0.331022	0.304251
	0.100134	0.664343	0.0320544	0.560481
	0.474585	1.04831	0.0428797	0.541402
	0.277663	0.330962	0.0549681	0.701285

## Sheet: Fig2C-source data
Fig2C-source data	Ctrl	SC51089		Ctrl	AH6809		Ctrl	L798106		Ctrl	AH23848
	1	1.1488		1.00012	0.894462		0.999989	1.05381		1.00001	0.940547
	1	0.948718		0.999986	1.03282		1.10635	0.95873		1.01225	1.12817
	1.06074	0.991328		1.00002	0.973625		0.999717	1.14785		0.999991	0.994762
	0.999898	1.02185		0.999989	0.905755		1	0.863201		1	1.06797
	1	0.972571		1	0.966835		1.04559	1.26358		1.00003	0.878969
	1	0.910763		1	0.869829		0.999994	0.882838		0.99999	0.96912
	1.03823	1.22908		0.999998	1.09947		0.999999	0.937771
	0.999912	0.909652		1	0.921796		1	0.980004
				1.05798	0.973914		1.03639	1.44687
				1.14309	1.10349

## Sheet: Fig2E-source data
Fig2E-source data	PGE2	SC51089	AH6809	L798106	AH23848
	0.637309	0.808868	0.946753	0.667038	0.81177
	0.560768	0.65201	0.952534	0.761782	0.783362
	0.624694	0.6072	0.973912	0.730434	0.828871
	0.580129	0.711717	0.977473	0.698385	0.821626
	0.642053	0.626583	0.96695	0.649053	0.821127
	0.478709		0.931063	0.644	0.845135
	0.664543		0.961769		0.809743
	0.759684		0.907005		0.753521
	0.760318		0.953109
			0.858753

## Sheet: Fig2F-source data
Fig2F-source data	Ctrl	Butaprost
	1	0.538531
	0.991886	0.827137
	0.979403	0.818648
	1.02895	0.678989
	0.950142	0.892649

## Sheet: Fig2G-source data
Fig2G-source data	Ctrl	CAY10598
	1	0.538531
	1	0.827137
	1	0.818648
	1	0.678989
	1	0.892649
	1.05506	0.70349
	1.00539	0.713789
	1.00001	0.721627
