# Supplementary material for: The Kv2.2 channel mediates the inhibition of prostaglandin E2 on glucose-stimulated insulin secretion in pancreatic β-cells
Source: eLife. 2025 Mar 3;13:RP97234. doi: 10.7554/eLife.97234 (PMC11875535; doi:10.7554/eLife.97234)
Supplement: Figure 3—source data 1. [file elife-97234-fig3-data1.xlsx]

## Sheet: Fig3A-source data
Fig3A-source data	0 min	2 min	5 min	10 min
	1	1.27516	1.52638	1.57459
	1	1.40641	1.36556	1.65083
	1	1.3106	1.33308	1.42843

## Sheet: Fig3B-source data
Fig3B-source data	Ctrl	Db-cAMP
	1	0.693444
	0.985263	0.701403
	1	0.645693
	1.00897	0.719681
	0.98654	0.888361
	0.961163	0.866409

## Sheet: Fig3C-source data
Fig3C-source data	Ctrl	Rp-cAMP
	1.06312	0.960129
	0.999984	0.962548
	1	1.01959
	1	0.930769
	0.999953	1.05223
	1.04618	0.994946
	0.999989	0.887823
	0.999963	1.10181

## Sheet: Fig3D-source data
Fig3D-source data	Rp-cAMP	Rp-cAMP+PGE2
	0.996676	1.01062
	1	0.974505
	1.00847	0.957014
	1.00003	0.994147
	0.996508	1.02868

## Sheet: Fig3F-source data
Fig3F-source data	KV2.2	13D	14D	17D	367D	448D	710D	799D	801D	840D
	170.505	140.944	114.558	123.504	131.418	52.6364	126.764	115.94	45.9898	208.978
	137.963	69.8406	117.962	145.229	130.632	49.4875	124.429	142.752	128.764	202.687
	78.5643	257.266	122.166	178.565	217.476	58.1236	148.857	234.118	162.741	48.944
	234.832	89.3011	133.284	125.26	187.228	112.766	138.553	76.875	62.4397	182.242
	169.706	193.929	128.959	91.7781	134.745	30.2747	203.47	141.296	208.531	131.264
	172.977	153.422	167.138	84.2168	101.42	48.7413	149.204	89.6587	87.0877	136.018
	287.967	81.8726	184.279	160.544	108.977	62.2385	169.364		62.3136	75.6411
	244.874	162.867	105.448	110.578	135.073	134.521	124.572		155.877	143.008
	282.598	102.477		148.466	144.898	125.632	124.813		90.9154	178.973
	177.75	124.463		58.4527	204.286	132.442	121.376		246.116	216.61
	140.315	158.944		68.2134	112.28	110.067	237.282		171.563	189.504
	161.375			190.318	186.406	42.3679	81.4408		124.759	87.2611
	196.962			268.466	131.953	77.4554				96.0365
	80.2959			111.8	90.3618	44.3404				129.36
	196.179			160.598		41.0889
	163.399					53.5332
	118.181					42.9822
	102.087					76.1418
	187.703					52.1226
						38.3654
						47.6336
						24.3941

## Sheet: Fig3G-source data
Fig3G-source data	Ctrl	PGE2
	0.990554	0.955423
	0.974669	1.05015
	0.991269	1.02393
	1.04559	1.08762
	1.00426	0.993396
	0.993657	0.889486

## Sheet: Fig3H-source data
Fig3H-source data	Ctrl	PGE2
	1.05204	0.946346
	0.965093	0.947559
	0.986157	1.03607
	0.982552	0.991766
	1.03571	1.03177
	0.978447	1.04649
