# Supplementary material for: The Kv2.2 channel mediates the inhibition of prostaglandin E2 on glucose-stimulated insulin secretion in pancreatic β-cells
Source: eLife. 2025 Mar 3;13:RP97234. doi: 10.7554/eLife.97234 (PMC11875535; doi:10.7554/eLife.97234)
Supplement: Figure 4—source data 1. [file elife-97234-fig4-data1.xlsx]

## Sheet: Fig4B-source data
Fig4B-source data	Ctrl	PGE2
	0.920906	0.604554
	0.977665	0.748223
	0.98773	0.702454
	0.991193	0.785428
	0.991952	0.801811
	0.963154	0.704833
	0.986155	0.745123
	0.97561	0.799071
	0.966383	0.681345
	0.970588	0.882353

## Sheet: Fig4C-source data
Fig4C-source data	Scramble	KD1-Kv2.2	KD2-Kv2.2	KD1/2-Kv2.2
	1	0.709168	0.143694	0.142934
	1	0.5658	0.125747	0.083876
	1	0.558675	0.104874	0.101524
	1	0.889265	0.347554
	1	0.808961	0.377931
	1	0.910871	0.336733
	1	0.660498	0.282709

## Sheet: Fig4D-source data
Fig4D-source data		Scramble						KD2-Kv2.2
	-80	1.66302	1.58573	1.71376	1.85945			2.63885	1.35228	1.30422	0.173499
	-70	2.12396	2.03073	1.60618	2.31777			3.04362	0.785912	0.951595	1.04099
	-60	3.26449	2.6366	1.67547	2.65684			3.58875	3.09642	1.25987	1.37519
	-50	5.24029	5.02194	1.96709	3.18357			4.70604	3.29214	4.58935	1.27782
	-40	13.3513	8.91221	3.53151	3.10592			6.15484	3.79607	7.62001	3.04555
	-30	21.9202	11.3635	6.47438	6.67983			9.47837	8.60581	10.345	3.987
	-20	33.5735	17.3163	11.1796	11.174			14.1369	10.6421	15.1118	4.78336
	-10	45.6216	28.3878	14.7916	18.8475			25.0819	13.2628	19.908	7.92825
	0	54.6147	40.7972	22.7718	30.3675			33.8897	20.6561	27.0388	10.3976
	10	66.4345	51.7511	32.8331	42.7213			44.9044	25.4926	33.8201	12.2076
	20	77.9548	66.0126	43.8541	56.0911			57.941	29.8911	42.9674	14.9599
	30	89.8491	79.0399	55.1362	75.968			70.2859	38.024	51.7403	19.2794
	40	97.0207	86.3612	68.7976	95.5189			81.6282	47.9632	64.194	22.362
	50	108.859	106.945	81.3635	111.182			92.3202	58.3446	75.9878	25.531

## Sheet: Fig4F-source data
Fig4F-source data	SC-Ctrl	SC-PGE2		KD2-Ctrl	KD2-PGE2
	1.01011	0.858427		0.997268	0.983607
	1	0.674569		1.09945	0.93186
	0.986447	0.865312		1	0.922246
	1.00699	0.97669		1.05432	0.908078
	1	0.766709		1	0.905063
	1.04829	0.750779		0.991453	1.0735
	1.00001	0.96751
	1.00904	0.784181
	0.985238	0.797188
	0.991449	0.732185
	1.03279	0.870669

## Sheet: Fig4G-source data
Fig4G-source data	Ctrl	Butaprost
	0.999128	0.823666
	1	0.365734
	0.999997	0.787299
	0.999993	0.766394
	1	0.712531
	1	0.656484
	0.994031	0.702059
	1.01712	0.774197
	0.999997	0.6148
	1	0.591935

## Sheet: Fig4H-source data
Fig4H-source data	Ctrl	CAY10598
	0.99237	0.673803
	0.999997	0.655549
	0.953876	0.853675
	1	0.589323
	1.00014	0.693855
	1.00001	0.532656
	1	0.745119
	1.05764	0.57212
	0.995343	0.715062

## Sheet: Fig4J-source data
Fig4J-source data	PGE2	TG4-155	GW627368
	0.604554	0.913187	1.00694
	0.702454	0.878903	0.972223
	0.801811	0.751131	0.955414
	0.704833	0.842986	0.979908
	0.799071		0.961539
	0.681345		0.885093
