# Supplementary material for: The Kv2.2 channel mediates the inhibition of prostaglandin E2 on glucose-stimulated insulin secretion in pancreatic β-cells
Source: eLife. 2025 Mar 3;13:RP97234. doi: 10.7554/eLife.97234 (PMC11875535; doi:10.7554/eLife.97234)
Supplement: Figure 5—figure supplement 1—source data 1. — Uncropped western blot images for Figure 5—figure supplement 1. [file elife-97234-fig5-figsupp1-data1.xlsx]

## Sheet: Fig5-figure supplement1A-source
	qPCR			WB
Fig5-figure supplement1A-source data	Ctrl	siRNA-EP1		Ctrl	siRNA-EP1
	1	0.473029		1	0.243164
	1	0.360982		1	0.366021
	1	0.351111		1	0.408951
	1	0.590496		1	0.19751
				1	0.348686
				1	0.257028

## Sheet: Fig5-figure supplement1B-source
	qPCR			WB
Fig5-figure supplement1B-source data	Ctrl	siRNA-EP2		Ctrl	siRNA-EP2
	1	0.0642571		1	0.702267
	1	0.0445016		1	0.684654
	1	0.0890031		1	0.687021
	1	0.343885		1	0.702267
	1	0.381565		1	0.684654
	1	0.273573		1	0.687021
				1	0.724588
				1	0.739035
				1	0.715137
				1	0.621071
				1	0.394903
				1	0.724768
				1	0.28932

## Sheet: Fig5-figure supplement1C-source
	qPCR			WB
Fig5-figure supplement1C-source data	Ctrl	siRNA-EP3		Ctrl	siRNA-EP3
	1	0.219151		1	0.400284
	1	0.173139		1	0.356055
	1	0.287175		1	0.589158
	1	0.233258		1	0.634416
	1	0.217638		1	0.770818
	1	0.346277

## Sheet: Fig5-figure supplement1D-source
	qPCR			WB
Fig5-figure supplement1D-source data	Ctrl	siRNA-EP4		Ctrl	siRNA-EP4
	1	0.0953912		1	0.710975
	1	0.0859714		1	0.670311
	1	0.103665		1	0.527069
	1	0.312083		1	0.814158
	1	0.163799
	1	0.496546
