# Supplementary material for: The Kv2.2 channel mediates the inhibition of prostaglandin E2 on glucose-stimulated insulin secretion in pancreatic β-cells
Source: eLife. 2025 Mar 3;13:RP97234. doi: 10.7554/eLife.97234 (PMC11875535; doi:10.7554/eLife.97234)
Supplement: Figure 5—source data 1. [file elife-97234-fig5-data1.xlsx]

## Sheet: Fig5A-source data
	AP firing frequency			Peak amplitude			Half-width
Fig5A-source data	Ctrl	PGE2		Ctrl	PGE2		Ctrl	PGE2
	0.791667	0.95		12.011	11.0595		77.1708	80.0661
	1.24167	0.233333		23.0287	23.97		37.8695	41.7049
	2.06667	1.6		7.64462	7.94059		27.8696	29.4966
	3.16667	0.316667		13.519	15.5929		47.5296	80.6121
	2.01667	1.66667		10.46	10.3266		74.9592	99.657
	2.26667	1.65		9.11668	7.08606		24.4708	38.1021
	1.36667	1.1		13.8845	11.2881		77.8999	81.9955
	1.8	1.19167		8.60533	8.8472		35.1491	46.4472
	1	0.616667		13.0726	14.9073		79.8348	92.9604

## Sheet: Fig5B-source data
	AP firing frequency			Peak amplitude			Half-width
Fig5B-source data	Ctrl	PGE2		Ctrl	PGE2		Ctrl	PGE2
	1.54167	0.95		9.07069	10.8111		32.4665	48.3977
	1.8	1.21667		18.99	18.9046		58.574	59.9903
	2.2	0.3		16.9506	14.2642		20.7284	24.7389
	1.65	1.58333		24.3477	23.1227		21.4004	19.3334
	1.01667	1.125		12.2599	12.3167		46.4493	48.2753
	3.71667	1.53333		11.0486	8.94474		49.0461	59.5096
	0.766667	0.333333		9.09521	11.8828		15.2003	14.3903
	1.13333	0.4		11.7186	10.831		50.6462	65.074

## Sheet: Fig5C-source data
	AP firing frequency			Peak amplitude			Half-width
Fig5C-source data	Ctrl	PGE2		Ctrl	PGE2		Ctrl	PGE2
	1.25	1.8		12.3506	12.2196		24.4971	25.1485
	0.95	1.03333		11.8657	12.4362		14.1469	15.8579
	1.01667	0.85		11.1092	11.4474		24.607	26.2052
	0.75	0.616667		12.3095	14.1194		28.8874	33.5241
	0.466667	0.183333		12.4519	12.7795		15.276	10.6854
	2.1	0.941667		10.4047	10.335		76.0463	83.19
