# Supplementary material for: The Kv2.2 channel mediates the inhibition of prostaglandin E2 on glucose-stimulated insulin secretion in pancreatic β-cells
Source: eLife. 2025 Mar 3;13:RP97234. doi: 10.7554/eLife.97234 (PMC11875535; doi:10.7554/eLife.97234)
Supplement: Figure 6—source data 1. [file elife-97234-fig6-data1.xlsx]

## Sheet: Fig6A-source data
	AP firing frequency			Peak amplitude			Half-width
Fig6A-source data	Ctrl	PGE2		Ctrl	PGE2		Ctrl	PGE2
	1.36667	1.3		8.37536	8.38665		43.1137	38.9241
	1.54167	0.433333		9.41353	8.94732		30.3072	41.8778
	1.56667	1.15833		6.65798	5.9646		34.1468	35.0354
	1.225	0.483333		14.4064	15.9389		45.1089	41.1483
	1.475	1.25833		19.5473	19.1455		52.4516	66.0436
	0.433333	0.158333		13.3357	14.1073		42.8549	54.1808

## Sheet: Fig6B-source data
	AP firing frequency			Peak amplitude			Half-width
Fig6B-source data	Ctrl	PGE2		Ctrl	PGE2		Ctrl	PGE2
	2.15	0.766667		13.24	11.23		29	53
	1.3	0.9		13.35	13.19		27.8	49
	0.583333	0.333333		14.1	13.87		53.23	59.4
	2.3	1		16.258	14.97		33.08	35.77
	2.11667	1.78333		11	11.46		17	16.34
	1.31667	1.03333		10.49	10.54		28.51	32.2
