# Supplementary material for: The Kv2.2 channel mediates the inhibition of prostaglandin E2 on glucose-stimulated insulin secretion in pancreatic β-cells
Source: eLife. 2025 Mar 3;13:RP97234. doi: 10.7554/eLife.97234 (PMC11875535; doi:10.7554/eLife.97234)
Supplement: Figure 7—figure supplement 1—source data 1. [file elife-97234-fig7-figsupp1-data1.xlsx]

## Sheet: Fig7-figure supplement1C-source
Fig7-figure supplement1C-source data	WT-Vehicle	WT-PGE2	KO-Vehicle	KO-PGE2
	18.8	19.3	19.4	20.5
	19.6	20.7	20.6	19.3
	19.6	19.8	19.5	19.8
	18.2	19.2	19.4	17.8
