# Supplementary material for: The Kv2.2 channel mediates the inhibition of prostaglandin E2 on glucose-stimulated insulin secretion in pancreatic β-cells
Source: eLife. 2025 Mar 3;13:RP97234. doi: 10.7554/eLife.97234 (PMC11875535; doi:10.7554/eLife.97234)
Supplement: Figure 7—source data 1. [file elife-97234-fig7-data1.xlsx]

## Sheet: Fig7A-source data
Fig7A-source data	Ctrl-2.8	Ctrl-2.8-PGE2	16.7	16.7-PGE2
	0.424554	0.460713	1.77278	0.904954
	0.465878	0.471044	1.80377	1.06509
	0.486541	0.378063	1.9639	1.07542

## Sheet: Fig7B-source data
Fig7B-source data	Scramble-2.8	Scramble-2.8-PGE2	KD2-2.8	KD2-2.8-PGE2	Scramble-16.7	Scramble-16.7-PGE2	KD2-16.7	KD2-16.7-PGE2
	0.512369	0.507203	0.546462	0.543362	2.00175	0.749105	1.52233	1.30088
	0.31091	0.491706	0.491706	0.584687	2.04341	0.760798	1.54206	1.32866
	0.295414	0.409057	0.664237	0.610515	2.07411	0.770299	1.56325	1.32866

## Sheet: Fig7C-source data
Fig7C-source data	Ctrl-0 PGE2-2.8G	Ctrl-10 PGE2-2.8G	KV2.2-0 PGE2-2.8G	KV2.2-10 PGE2-2.8G	S448A-0 PGE2-2.8G	S448A-10 PGE2-2.8G	Ctrl-0 PGE2	Ctrl-10 PGE2	KV2.2-0 PGE2	KV2.2-10 PGE2	S448A-0 PGE2	S448A-10 PGE2
	0.402	0.353	0.38	0.358	0.508	0.498	1.878	1.134	1.987	0.937	1.922	1.514
	0.387	0.339	0.478	0.367	0.516	0.506	1.769	1.123	2.015	1.089	1.872	1.427
	0.365	0.389	0.438	0.46	0.386	0.474	1.896	0.987	1.905	1.113	1.861	1.322

## Sheet: Fig7D-source data
Fig7D-source data	Time (min)	WT-Vehicle						KO-Vehicle						WT-PGE2						KO-PGE2
	0	2.7	2.8	3	3.8	3.4		3.4	3.4	2.8	3.1	3.1		3.4	2.8	2.9	3.3	2.9		3.2	3.4	3.2	4.2	3.1
	15	16.6	25.6	19.5	13.7	22.3		15.3	12.8	22.8	18.7	21.4		27.9	10.4	19.4	20.4	23.2		19.6	18.5	16.4	18.9	17.6
	30	14.6	8.9	19.1	9.8	17		11.8	13.6	14	11.9	15.8		20.9	12.7	23.7	22.8	22.3		15.2	20.3	19.4	13.4	13.8
	60	6.2	5.4	8.7	5.1	8.4		6.8	6.2	7.3	6.8	6.6		11.4	6.9	15.7	9.6	12.3		8	9.2	9.5	5.6	6.1
	90	4.4	2.8	4.9	3.1	5.6		4.9	3.2	3.9	4.6	4.7		4.9	4.1	8.5	5.9	5.9		5.2	4.3	4.3	3.7	4.8
	120	3.2	2.6	5.5	2.6	6.3		3.4	3.3	2.6	3.7	3.7		3.5	2.9	4.9	4.5	5.2		4.2	3.6	4.2	3.3	3.9
	WT-Vehicle	WT-PGE2	WT-Vehicle	KO-PGE2
	0.9638	1.456	0.9225	1.119
	1.235	1.646	1.053	1.184
	0.7395	1.376	0.969	0.945
	1.257	1.496	1.094	0.9833

## Sheet: Fig7E-source data
Fig7E-source data	WT-16.7	WT-16.7-PGE2	KO-16.7	KO-16.7-PGE2
	6.71563	2.53892	4.54725	4.3565
	6.25667	2.57034	4.46613	4.35723
	5.79478	2.57034	4.31484	4.31046
	4.20796	2.82942	3.28985	2.4112
	4.05174	2.8212	3.28492	2.40189
