# Supplementary material for: The Kv2.2 channel mediates the inhibition of prostaglandin E2 on glucose-stimulated insulin secretion in pancreatic β-cells
Source: eLife. 2025 Mar 3;13:RP97234. doi: 10.7554/eLife.97234 (PMC11875535; doi:10.7554/eLife.97234)
Supplement: Figure 8—source data 1. [file elife-97234-fig8-data1.xlsx]

## Sheet: Fig8A-source data
Fig8A-source data		WT										KO
	-80	5.53771	-9.91568	17.706	8.76174	2.51249	1.59162	2.39278				3.78197	4.56338	3.98232	4.42037	5.11332	8.81877	1.74497	-1.85434	-5.80854
	-70	6.98233	-8.31867	24.0398	10.2468	2.20609	2.07603	-2.99892				5.00383	4.05	1.95052	6.17719	10.8759	11.2555	1.31842	-1.84894	-4.18577
	-60	5.65809	-7.56759	24.1837	15.7414	3.24785	3.73685	0.557344				11.055	3.99295	3.1696	5.83716	20.2909	19.5521	2.44296	2.28324	-3.48629
	-50	6.3804	-5.12911	44.9127	17.375	2.57377	1.52242	1.11409				16.3497	6.10352	5.36394	9.97418	23.294	27.5587	2.55929	0.58907	-2.07156
	-40	14.9277	-2.76832	63.7702	24.3547	1.34817	3.87525	-2.89492				24.8446	6.67394	4.63249	15.4713	29.5436	40.9609	4.0716	-0.68785	-1.18689
	-30	26.8458	3.62919	92.2725	61.0352	1.22561	4.84406	-2.28746				29.9066	7.98591	3.7385	22.4986	43.3415	58.1923	5.35124	3.22573	0.029709
	-20	45.8667	9.03697	142.655	97.1216	1.40945	8.44251	0.046108				38.7506	9.81126	12.4346	30.3759	52.8376	70.8983	7.71664	5.1646	2.18833
	-10	68.3786	18.2346	197.501	156.969	3.37041	16.6774	10.6136				51.3766	15.2303	27.3073	41.1435	65.2557	91.2626	13.7271	10.0073	6.56607
	0	99.7991	40.0572	259.255	215.479	9.86613	36.8149	24.9103				61.5588	19.6796	41.2048	49.2475	78.8912	121.2	21.4825	15.2313	12.7104
	10	151.805	64.6228	339.724	295.226	27.3923	55.1531	44.1919				74.883	26.981	60.2224	64.6055	97.5589	139.708	28.4236	21.9131	18.8468
	20	225.481	91.3648	411.124	391.605	49.7596	75.6365	65.1405				88.149	34.9669	89.0739	78.66	119.311	164.83	36.4892	24.6476	25.3364
	30	294.1	115.866	509.586	520.061	71.8205	97.5732	86.3932				107.99	42.8957	109.392	93.1679	134.083	199.989	43.0038	30.4958	30.8376
	40	372.591	149.799	600.131	610.797	97.3131	115.012	107.26				128.354	51.4521	131.01	115.666	150.397	220.179	50.1776	33.3543	37.0909
	50	453.129	168.34	754.878	746.827	119.006	134.665	124.96				146.74	62.0619	150.353	135.898	172.392	247.506	56.188	36.978	41.0373

## Sheet: Fig8B-source data
Fig8B-source data	Ctrl																						PGE2
WT	1.00249	0.999711	0.9542	0.991698	1.00004	1.01135	0.995757	1.00035	0.964692	0.97807	1.00639	0.955455	0.990713	0.999999	1.00163	1	0.967139	0.985131					0.769351	0.895545	0.853367	0.609842	0.787549	0.701995	0.785823	0.624455	0.767134	0.749452	0.982025	0.529923	0.840157	0.857461	0.714984	0.683632	0.862785	0.802176
KO	0.976	1	1	0.999403	0.970502	1.20002	0.939515	1.02202	0.991759	1.00274	0.988088	1.00008											1.071	1.08617	0.785714	0.927666	1.27112	1.35971	1.35971	0.925836	1.06847	0.968183	1.17902

## Sheet: Fig8C-source data
	AP firing frequency			Peak amplitude			Half-width
Fig8C-source data	WT-Ctrl	WT-PGE2		WT-Ctrl	WT-PGE2		WT-Ctrl	WT-PGE2
	4.10833	2.69167		10.0467	10.5036		15.0842	15.7018
	3.4	2.83333		6.24908	6.14572		41.9986	44.13
	4.175	2.29167		5.60736	5.46046		44.8258	46.5629
	2.60833	1.78333		5.94478	5.60556		30.7546	34.7309

## Sheet: Fig8D-source data
	AP firing frequency			Peak amplitude			Half-width
Fig8D-source data	KO-Ctrl	KO-PGE2		KO-Ctrl	KO-PGE2		KO-Ctrl	KO-PGE2
	2.35	1.98333		11.8755	9.74161		51.4649	52.5907
	1.96667	1.91667		12.2194	11.9561		37.3262	51.0886
	2.21667	2.01667		15.1298	10.7496		45.7413	49.859
